# Supplementary material for: Knowledge of Mange among Masai Pastoralists in Kenya
Source: PubMed Central journal article supplement (PMC3422303; doi:10.1371/journal.pone.0043342), 2012-08-17
Supplement: pone.0043342.s001.pdf [file pone.0043342.s001.pdf]

**Questionnaire on knowledge of mange among pastoralists**

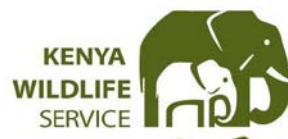

**Study Area -----Date.....**

**Name of Interviewer.....**

**Name of Pastoralist.....**

Question 1: Have you ever heard of mange?  
Yes....., No.....

Question 2: Do you know what the etiology is?  
Yes....., No.....

Question 3: Have you heard about mites?  
Yes....., No.....

Question 4: (a) Have your animals been affected by this disease?  
Yes....., No.....  
(b) If yes which particular ones? .....

Question 5: (a) Are you aware if wild animals are affected by this disease?  
Yes....., No.....  
(b) If yes which particular ones? .....

Question 6: Do you think there is cross-infection between domestic and wild animals?  
Yes....., No.....

Question 7: (a) Do you institute any control/preventive measures?  
Yes....., No.....  
(b) If yes which methods do you use? .....
